# Supplementary material for: Agrobacterium Uses a Unique Ligand-Binding Mode for Trapping Opines and Acquiring A Competitive Advantage in the Niche Construction on Plant Host
Source: PubMed Central journal article supplement (PMC4192606; doi:10.1371/journal.ppat.1004444), 2014-10-09
Supplement: ppat.1004444.s001.pdf [file ppat.1004444.s001.pdf]

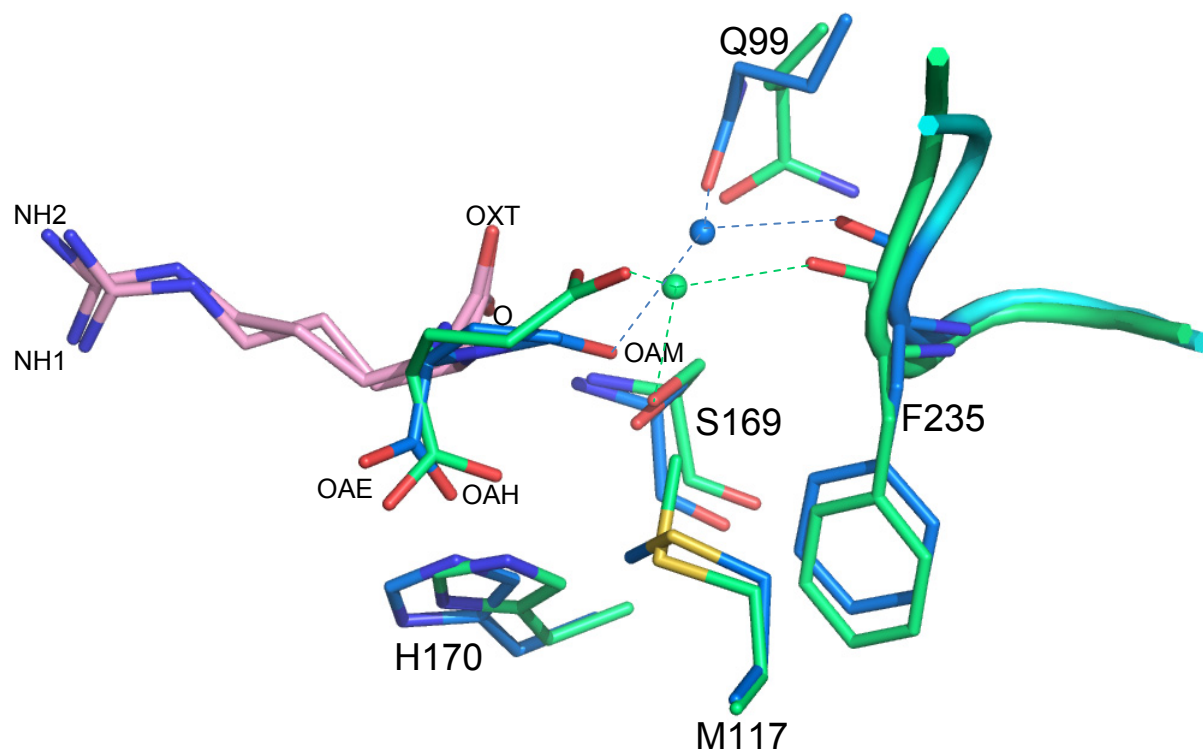

**Figure S1. Structural comparison between NocT-nopaline vs NocT-pyronepaline.** Structural comparison between the binding sites of NocT in complex with nopaline (shown as pink/limegreen stick) and pyronepaline (shown as pink/blue stick). Close-up view around the  $\alpha$ -KG part of both ligands. The region 234-238 and the Met117, His170, Ser169 and Gln99 positions are affected by the type of bound ligand.
