# Supplementary material for: Agrobacterium Uses a Unique Ligand-Binding Mode for Trapping Opines and Acquiring A Competitive Advantage in the Niche Construction on Plant Host
Source: PubMed Central journal article supplement (PMC4192606; doi:10.1371/journal.ppat.1004444), 2014-10-09
Supplement: ppat.1004444.s002.pdf [file ppat.1004444.s002.pdf]

## Fluorescence

NocT<sub>wt</sub>-Nopaline

$$K_D = 3.7 \pm 0.6 \mu\text{M}$$

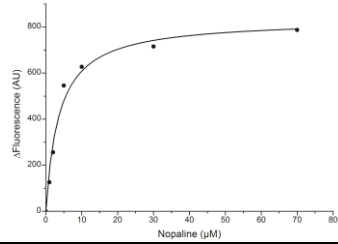

NocT<sub>wt</sub>-Pyronopaline

$$K_D = 0.5 \pm 0.07 \mu\text{M}$$

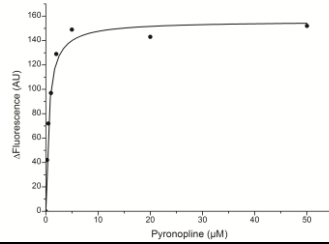

NocT<sub>M117S</sub>-Pyronopaline

$$K_D = 37.8 \pm 9 \mu\text{M}$$

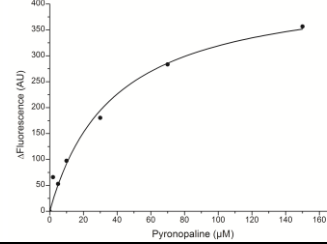

NocT<sub>M117N</sub>-Pyronopaline

$$K_D = 39.9 \pm 7 \mu\text{M}$$

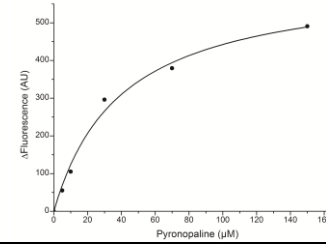

NocT<sub>wt</sub>-Arginine

No interaction

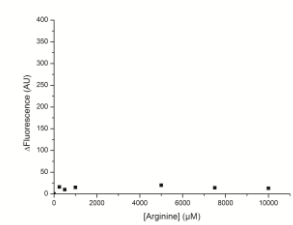

## ITC

NocT<sub>wt</sub>-Nopaline

Non Acquired

NocT<sub>wt</sub>-Pyronopaline

$$K_D = 0.58 \pm 0.05 \mu\text{M}$$

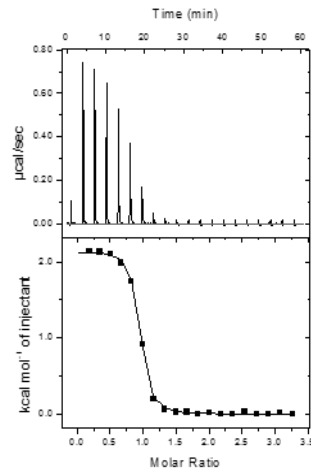

NocT<sub>wt</sub>-Arginine

No interaction

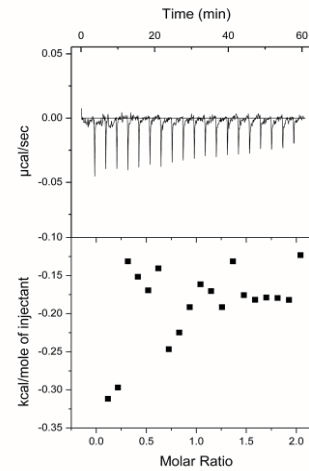

NocT<sub>wt</sub>-Histidine

No interaction

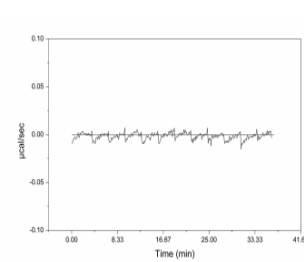

NocT<sub>wt</sub>-Ornithine

No interaction

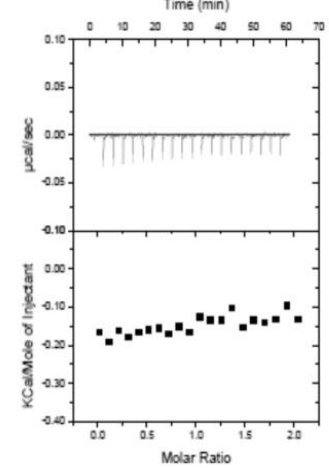

ITC and Fluorescence  $K_D$  measurements.

NocT fluorescence monitoring upon titration with each ligand and fit (solid line) to a single binding model using Origin. Measures were done in triplicates.

NocT ITC : The top panel show heat differences upon injection of ligand and lower panel show integrated heats of injection and the best fit (solid line) to a single binding model using Microcal Origin.
