# Supplementary material for: Agrobacterium Uses a Unique Ligand-Binding Mode for Trapping Opines and Acquiring A Competitive Advantage in the Niche Construction on Plant Host
Source: PubMed Central journal article supplement (PMC4192606; doi:10.1371/journal.ppat.1004444), 2014-10-09
Supplement: ppat.1004444.s003.pdf [file ppat.1004444.s003.pdf]

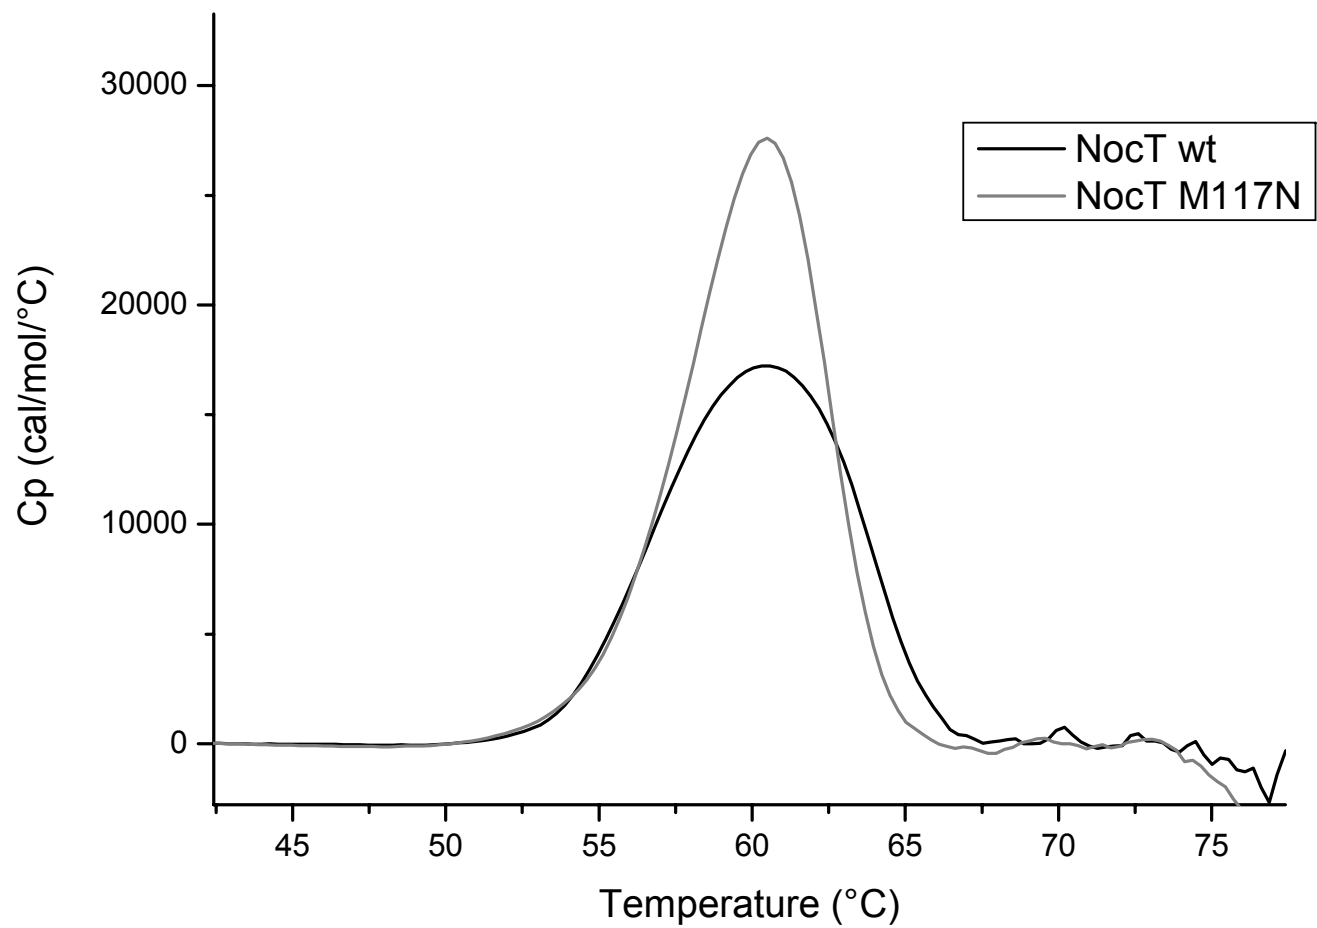

**Figure S3. Differential scanning calorimetry (DSC) thermogram of NocT and NocT-M117N**
