# Supplementary material for: Agrobacterium Uses a Unique Ligand-Binding Mode for Trapping Opines and Acquiring A Competitive Advantage in the Niche Construction on Plant Host
Source: PubMed Central journal article supplement (PMC4192606; doi:10.1371/journal.ppat.1004444), 2014-10-09
Supplement: ppat.1004444.s004.pdf [file ppat.1004444.s004.pdf]

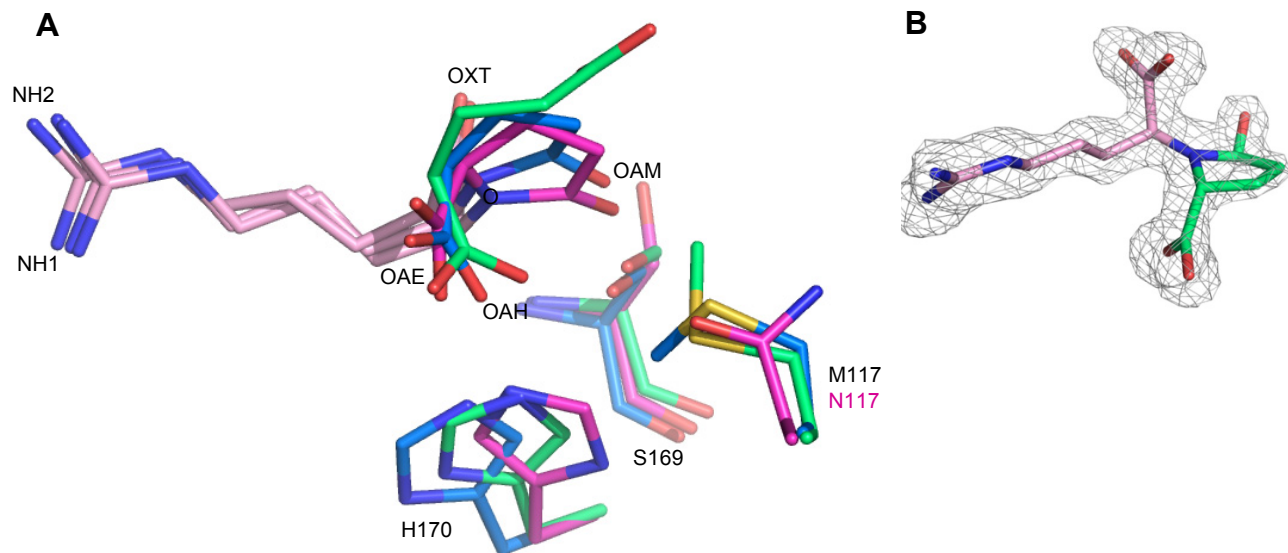

**Figure S4. Structural comparison between NocT vs NocT-M117N.** **A**, Structural comparison between the binding sites of NocT in complex with nopaline (shown as pink/limegreen stick) and pyronopaline (shown as pink/blue stick) and M117N-NocT mutant in complex with pyronopaline (shown as pink/magenta stick). Close-up view around the  $\alpha$ -KG part of the ligand; **B**, pyronopaline bound to the ligand binding site of M117N-NocT in its annealing Fo-Fc omit map contoured at  $4\sigma$ .
