# Supplementary material for: Agrobacterium Uses a Unique Ligand-Binding Mode for Trapping Opines and Acquiring A Competitive Advantage in the Niche Construction on Plant Host
Source: PubMed Central journal article supplement (PMC4192606; doi:10.1371/journal.ppat.1004444), 2014-10-09

Figure S5 Mass spectrometry (M-H) of nopaline and pyronopaline

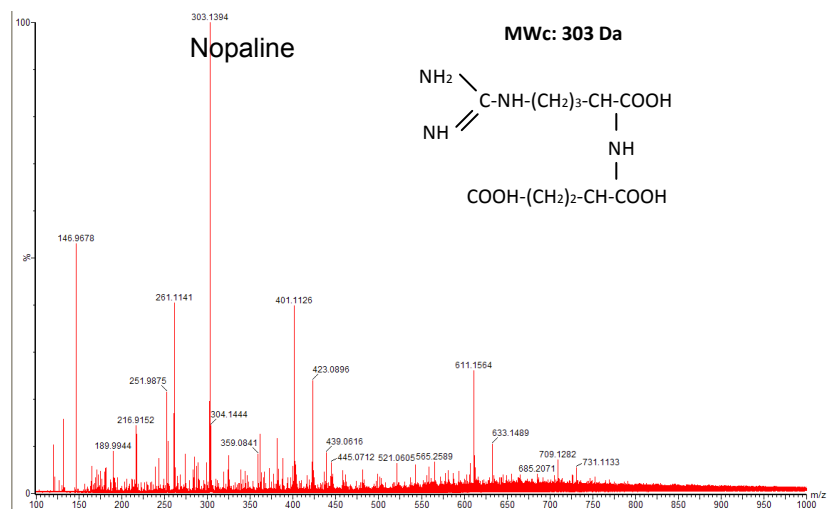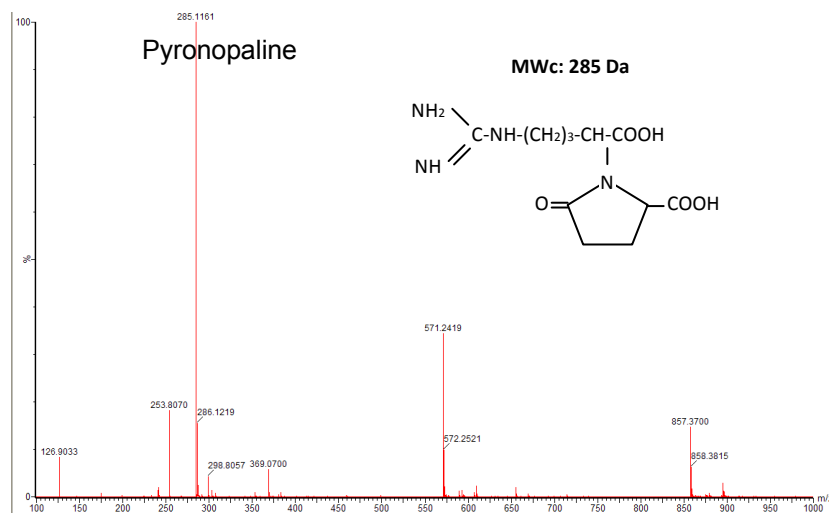

Supplement: ppat.1004444.s005.pdf [file ppat.1004444.s005.pdf]
