# Supplementary material for: Agrobacterium Uses a Unique Ligand-Binding Mode for Trapping Opines and Acquiring A Competitive Advantage in the Niche Construction on Plant Host
Source: PubMed Central journal article supplement (PMC4192606; doi:10.1371/journal.ppat.1004444), 2014-10-09
Supplement: ppat.1004444.s006.pdf [file ppat.1004444.s006.pdf]

**Table S1. Crystallographic data and refinement parameters**

| NocT                                    | Unliganded                                                       | Nopaline                                                    | Pyronopaline                                                | M117N-<br>Pyronopaline                                      |
|-----------------------------------------|------------------------------------------------------------------|-------------------------------------------------------------|-------------------------------------------------------------|-------------------------------------------------------------|
| PDB code                                | 4P0I                                                             | 4POX                                                        | 4POW                                                        | 4PP0                                                        |
| Space group<br>Cell parameters<br>(Å,°) | C2<br>$a = 118.9$<br>$b = 69.7$<br>$c = 74.4$<br>$\beta = 117.9$ | P3 <sub>2</sub><br>$a = 114.4$<br>$b = 114.4$<br>$c = 37.8$ | P3 <sub>2</sub><br>$a = 114.5$<br>$b = 114.5$<br>$c = 37.8$ | P3 <sub>2</sub><br>$a = 114.6$<br>$b = 114.6$<br>$c = 37.9$ |
| Resolution (Å)                          | 38.8- 1.89<br>(2-1.89)                                           | 50- 2.29<br>(2.43-2.29)                                     | 22.7 - 1.55<br>(1.64- 1.55)                                 | 23- 1.57<br>(1.66-1.57)                                     |
| No. of observed reflections             | 259569<br>(41688)                                                | 85996<br>(13013)                                            | 446821<br>(66404)                                           | 437965<br>(66081)                                           |
| No. of unique reflections               | 43103<br>(6909)                                                  | 24543<br>(3717)                                             | 80447<br>(12944)                                            | 77698<br>(12464)                                            |
| R <sub>sym</sub> (%)                    | 5.3<br>(53.4)                                                    | 10.6<br>(96.1)                                              | 5<br>(73.6)                                                 | 4.9<br>(75)                                                 |
| Completeness (%)                        | 99.4<br>(99.2)                                                   | 98.8<br>(93.1)                                              | 99.9<br>(99.3)                                              | 99.8<br>(99)                                                |
| I/σ                                     | 22.43<br>(3.61)                                                  | 9.2<br>(1.29)                                               | 17.3<br>(2.02)                                              | 18.94<br>(2)                                                |
| R <sub>cryst</sub> (%)                  | 20.5                                                             | 18.9                                                        | 17                                                          | 16.7                                                        |
| R <sub>free</sub> (%)                   | 23.6                                                             | 21.8                                                        | 19                                                          | 18.3                                                        |
| rms bond deviation (Å)                  | 0.01                                                             | 0.009                                                       | 0.01                                                        | 0.01                                                        |
| rms angle deviation (°)                 | 1.06                                                             | 1.07                                                        | 1.05                                                        | 1.03                                                        |
| Average B (Å <sup>2</sup> )             |                                                                  |                                                             |                                                             |                                                             |
| protein                                 | 39.4                                                             | 49.2                                                        | 29.6                                                        | 30.8                                                        |
| ligand                                  | -                                                                | 44.4                                                        | 23                                                          | 22                                                          |
| solvent                                 | 38.3                                                             | 47.7                                                        | 39.6                                                        | 39.5                                                        |

Values for the highest resolution shell are in parentheses
