# Supplementary material for: Agrobacterium Uses a Unique Ligand-Binding Mode for Trapping Opines and Acquiring A Competitive Advantage in the Niche Construction on Plant Host
Source: PubMed Central journal article supplement (PMC4192606; doi:10.1371/journal.ppat.1004444), 2014-10-09
Supplement: ppat.1004444.s007.pdf [file ppat.1004444.s007.pdf]

**Table S2. Transcriptomic fold change (Fch>20 in bold face) in *A. tumefaciens accR* mutant in the presence vs absence of nopaline/pyronopaline**

| atu code              | Gene name          | FCh<br>μarrays | FCh<br>RT-qPCR | Function / putative function                                  |
|-----------------------|--------------------|----------------|----------------|---------------------------------------------------------------|
| <i>atu1467</i>        |                    | -12.49         | -              | hypothetical protein                                          |
| <i>atu1468</i>        |                    | -45.97         | -              | conserved hypothetical protein                                |
| <i>atu1643</i>        |                    | 10.65          | -              | conserved hypothetical protein                                |
| <i>atu1847</i>        |                    | 6.55           | -              | hypothetical protein                                          |
| <i>atu1996</i>        |                    | -5.91          | -              | hypothetical protein                                          |
| <i>atu1997</i>        | <i>cysJ</i>        | -38.93         | -71.94         | sulfite reductase                                             |
| <i>atu2019</i>        | <i>ilvC</i>        | -3.35          | -              | ketol-acid reductoisomerase                                   |
| <i>atu2022</i>        | <i>adh</i>         | -3.62          | -              | NADP-dependent alcohol dehydrogenase                          |
| <i>atu2107</i>        | <i>tnp</i>         | 6.40           | -              | IS3 family transposase                                        |
| <i>atu2224</i>        | <i>aldA</i>        | -4.47          | -              | aldehyde dehydrogenase                                        |
| <b><i>atu4007</i></b> | <b><i>arcA</i></b> | <b>49.90</b>   | 98.02          | arginase                                                      |
| <i>atu4155</i>        |                    | 3.46           | -              | ABC transporter, membrane spanning protein                    |
| <i>atu4676</i>        |                    | 3.53           | -              | putative malate dehydrogenase                                 |
| <i>atu4678</i>        |                    | 3.27           | -              | ABC transporter, substrate binding protein                    |
| <i>atu4732</i>        |                    | 3.16           | -              | fimbrial chaperone                                            |
| <i>atu4858</i>        | <i>traG</i>        | 3.53           | -              | Agrobacterium virulence virD4-like protein                    |
| <b><i>atu6016</i></b> | <b><i>ocd</i></b>  | <b>40.42</b>   | -              | ornithine cyclodeaminase                                      |
| <b><i>atu6017</i></b> | <b><i>odh</i></b>  | <b>21.63</b>   | -              | NAD/NADP octopine/nopaline dehydrogenase                      |
| <b><i>atu6018</i></b> | <b><i>arc</i></b>  | <b>38.32</b>   | -              | arginase                                                      |
| <b><i>atu6019</i></b> | <b><i>noxA</i></b> | <b>20.40</b>   | -              | D-nopaline dehydrogenase                                      |
| <b><i>atu6020</i></b> |                    | <b>45.97</b>   | -              | conserved hypothetical protein                                |
| <b><i>atu6021</i></b> | <b><i>noxB</i></b> | <b>35.49</b>   | 147.27         | D-nopaline dehydrogenase                                      |
| <b><i>atu6022</i></b> | <b><i>hyuA</i></b> | <b>46.54</b>   | -              | N-methylhydantoinase A/acetone carboxylase, beta subunit      |
| <b><i>atu6023</i></b> | <b><i>hyuB</i></b> | <b>25.89</b>   | -              | N-methylhydantoinase B/acetone carboxylase, alpha subunit     |
| <b><i>atu6024</i></b> |                    | 5.68           | -              | transcriptional regulator, LysR family                        |
| <b><i>atu6025</i></b> | <b><i>nocM</i></b> | <b>21.01</b>   | -              | ABC transporter, membrane spanning protein [nopaline]         |
| <b><i>atu6026</i></b> | <b><i>nocQ</i></b> | <b>24.40</b>   | -              | ABC transporter, membrane spanning protein [nopaline]         |
| <b><i>atu6027</i></b> | <b><i>nocT</i></b> | <b>54.47</b>   | 68.14          | ABC transporter, substrate binding protein [nopaline]         |
| <b><i>atu6028</i></b> | <b><i>nocP</i></b> | <b>55.03</b>   | 99.80          | ABC transporter, nucleotide binding/ATPase protein [nopaline] |
| <i>atu6096</i>        |                    | 3.15           | -              | conserved hypothetical protein                                |
| <i>atu6097</i>        | <i>fic</i>         | 3.29           | -              | cell filamentation protein                                    |
| <i>atu8021</i>        |                    | -3.53          | -              | conserved hypothetical protein                                |
